# Supplementary material for: Identification of Mammalian microRNA Host Genes and Transcription Units
Source: HighWire-hosted journal article supplement (doi:10.1101/gr.2722704), 2004-09-13
Supplement: Rodriguez_SupLegend.pdf [file Rodriguez_SupLegend.pdf]

## **SUPPLEMENTAL TABLES A-E LEGEND**

miRNAs are listed by numerical order, host gene clustering and positional order if more than one miRNA is present in a host TU. Human miRNAs and transcription hosts are shown in yellow whereas mouse miRNAs are shown in light blue. A separate line for a miRNA conveys a hit to a particular TU. To bring to light potential complexities of miRNA transcription, TUs on the opposite coding strand of miRNAs are also shown. Where possible, we list host transcripts from Vega, ENSEMBL or RIKEN. We also list some host genes from FLJ, NCBI Assembly AceView, and NCBI. miRNAs only identified within introns or exons of transcripts on the opposite coding strand were not tallied in overall totals, but are shown here. ENSEMBL IDs for mouse NCBI Build 30 are shown in several instances where errors in the mouse NCBI Build 32 assembly were detected. Accession Numbers for EST clones corresponding to particular ENSEMBL transcripts can be found at (<http://www.ensembl.org/>). Some 'mixed' miRNAs are shown in more than one Table but were only tallied once. hsa = human; mmu = mouse.
